# Supplementary material
Source: PubMed Central journal article supplement (PMC6397681)
Supplement: NIHMS1517449-supplement-1.pdf [file NIHMS1517449-supplement-1.pdf]

## Supplemental Tables

**Table S1. PCR primer sequences**

|                   |                            |
|-------------------|----------------------------|
| mSUV39H1-F        | GCACAAGTTTGCCTACAATGACC    |
| mSUV39H1-B        | GATGCCTTTCTGGACTACACGG     |
| mRPL13a-F         | AAGTTTGCTTACCTGGGGCGTCTG   |
| mRPL13a-B         | ATCTGCTTCTTCTTCCGATAGTGC   |
| mIFNg-F           | CCATCAGCAACAACATAAGCGTC    |
| mIFNg-B           | TCTCTTCCCCACCCCGAATCAGCAG  |
| mFasL-F           | GTCAGTTTTTCCCTGTCCATCTTG   |
| mFasL-B           | CCTAATCCCATTCCAACCAGAGC    |
| mGZMB-F           | GCCCACAACATCAAAGAACAGG     |
| mGZMB-B           | CCAACCAGCCACATAGCACAC      |
| mPRF1-F           | CCTATGGCACGCACTTTATCACG    |
| mPRF1-B           | TTCACTGGAGACGCTGGCTTGG     |
| mIFNgCHIP1-F1     | AAGTCTCCAGCAGCAGAAGGTG     |
| mIFNgCHIP1-B1     | GACAGTCAGGAACATCTCTTGGTTG  |
| mIFNgCHIP2-F1     | CCTTTTCTTCTTTCTGGGCACG     |
| mIFNgCHIP2-B1     | TTTGTGGTTGGGGACGGCTG       |
| mIFNgCHIP3-F1     | CAAAACTACGCAGGGAAACAGC     |
| mIFNgCHIP3-B1     | TAAAACAACCTTCGGGGGAGGGGGGC |
| mGZMBCHIP1-F1     | TGTTGCTGTGCTGGTCATTGTG     |
| mGZMBCHIP1-B1     | CTCAGGGTGCTGTGCCAAAG       |
| mGZMBCHIP2-F1     | ACCAGGCTCTTCCCATCCTTAG     |
| mGZMBCHIP2-B1     | CGTGGCAAACCCATTCTTATG      |
| mGZMBCHIP3-F1     | GTGTTTATGACCCCGAGTAGATG    |
| mGZMBCHIP3-B1     | GAGCCCTGTGAAGCACTGAGTTAG   |
| mPerforinCHIP1-F1 | AGCCATCTCTCCAGCCCCTG       |
| mPerforinCHIP1-B1 | TCCATCACCTCCCCCTTGC        |
| mPerforinCHIP2-F1 | TTTTACCCACCTCATAACCAGCAC   |
| mPerforinCHIP2-B1 | CCCCTTCTGTCCATACCTACATC    |
| mPerforinCHIP3-F1 | AAGACCTCTGCTCACCCCACTC     |
| mPerforinCHIP3-B1 | CCACGGATGGAGAACTGGC        |
| mFasLCHIP1-F1     | GGAGGCTGAAAGGACTGAGTTTG    |
| mFasLCHIP1-B1     | CTGCTGAAGGAAAAATGGATGC     |
| mFasLCHIP2-F1     | GAAAGTAATGGGAACCGAGACTGAG  |
| mFasLCHIP2-B1     | ACACACACACACACACACAAG      |
| mFasLCHIP3-F1     | TCACCACTACCACCGCCATC       |
| mFasLCHIP3-B1     | TCCAACCAGAGCCACCAGAAC      |
| mNXF2CHIP-F1      | CCAAGGAATGTGGGTGGTTAGTG    |
| mNXF2CHIP-B1      | GATGCCGTGAACAGGGGAAC       |

**Table S2. Mouse body weight change after F5446 treatment**

| Day of weight measurement** | Vehicle* |        | F5446 10 mg/kg* |        | F5446 20 mg/kg* |        |
|-----------------------------|----------|--------|-----------------|--------|-----------------|--------|
|                             | % change | CV (%) | % change        | CV (%) | % change        | CV (%) |
| 1                           | 0.02     | 0.50   | 0.02            | 6.92   | 0.00            | 3.81   |
| 3                           | 7.38     | 2.55   | 1.59            | 6.36   | -3.01           | 3.53   |
| 5                           | 9.74     | 2.72   | 2.26            | 8.36   | -1.04           | 3.76   |
| 7                           | 8.96     | 3.31   | 1.48            | 6.55   | -6.53           | 7.23   |
| 9                           | 8.85     | 5.50   | 2.59            | 5.01   | -6.94           | 4.41   |
| 11                          | 8.29     | 6.17   | 2.48            | 4.73   | -5.08           | 1.36   |
| 13                          | 10.3     | 6.93   | 3.04            | 4.63   | -8.39           | 2.09   |
| 14                          | 11.5     | 6.89   | 2.26            | 4.73   | -6.74           | 2.91   |

\* N=5 for all three groups. \*\* Weight measurement was conducted immediately after dosing except at end point-Sacrificed

**Table S3. Hematology values<sup>a</sup> of C57BL/6J mice treated with vehicle or F5446.**

| Test**                        | Vehicle           | F5446             |                   |
|-------------------------------|-------------------|-------------------|-------------------|
|                               |                   | 10 mg/kg          | 20 mg/kg          |
| WBC # (K/ $\mu$ L)            | 7.85 $\pm$ 2.85   | 8.03 $\pm$ 1.45   | 7.28 $\pm$ 2.35   |
| Neutrophil # (K/ $\mu$ L)     | 2.12 $\pm$ 1.12   | 1.89 $\pm$ 0.92   | 1.86 $\pm$ 0.77   |
| Lymphocyte # (K/ $\mu$ L)     | 5.32 $\pm$ 1.79   | 5.79 $\pm$ 0.95   | 4.70 $\pm$ 1.31   |
| Monocyte # (K/ $\mu$ L)       | 0.31 $\pm$ 0.18   | 0.32 $\pm$ 0.05   | 0.48 $\pm$ 0.31   |
| Eosinophil # (K/ $\mu$ L)     | 0.08 $\pm$ 0.07   | 0.03 $\pm$ 0.01   | 0.19 $\pm$ 0.18   |
| Basophil # (K/ $\mu$ L)       | 0.04 $\pm$ 0.03   | 0.01 $\pm$ 0.01   | 0.04 $\pm$ 0.04   |
| nucleated RBCs # (K/ $\mu$ L) | 0 $\pm$ 0         | 0 $\pm$ 0         | 0 $\pm$ 0         |
| Hematocrit (%)                | 36.4 $\pm$ 1.5    | 34.2 $\pm$ 1.2    | 31.8 $\pm$ 1.4    |
| RBC (M/ $\mu$ L)              | 8.23 $\pm$ 0.38   | 7.93 $\pm$ 0.31   | 7.29 $\pm$ 0.39   |
| Hemoglobin (g/dL)             | 12.5 $\pm$ 0.6    | 12.2 $\pm$ 0.4    | 11.2 $\pm$ 0.5    |
| MCV (fL)                      | 44.3 $\pm$ 1.5    | 43.1 $\pm$ 0.5    | 43.6 $\pm$ 0.7    |
| MCH (pg)                      | 15.2 $\pm$ 0.8    | 15.4 $\pm$ 0.2    | 15.4 $\pm$ 0.5    |
| MCHC (g/dL)                   | 34.3 $\pm$ 0.9    | 35.7 $\pm$ 0.4    | 35.3 $\pm$ 1.3    |
| RDW (%)                       | 12.5 $\pm$ 0.5    | 12.2 $\pm$ 0.1    | 13.4 $\pm$ 1.7    |
| Reticulocyte # (K/ $\mu$ L)   | 7.0 $\pm$ 14.0    | 2.6 $\pm$ 4.0     | 26.2 $\pm$ 23.3   |
| Reticulocyte (%)              | 0.09 $\pm$ 0.18   | 0.03 $\pm$ 0.05   | 0.37 $\pm$ 0.34   |
| Platelet # (K/ $\mu$ L)       | 525 $\pm$ 107     | 588 $\pm$ 84      | 632 $\pm$ 145     |
| PCT (%)                       | 0.296 $\pm$ 0.057 | 0.326 $\pm$ 0.042 | 0.357 $\pm$ 0.090 |
| MPV (fL)                      | 5.7 $\pm$ 0.1     | 5.6 $\pm$ 0.1     | 5.6 $\pm$ 0.2     |
| PDW (%)                       | 29.7 $\pm$ 0.7    | 30.1 $\pm$ 0.4    | 29.6 $\pm$ 0.8    |

\*Values represent means  $\pm$  SD (n=3-5).

\*\**Abbreviations:* WBC: White blood cells; RBC: Red blood cells; MCV: Mean corpuscular volume; MCH: Mean corpuscular hemoglobin; MCHC: Mean corpuscular hemoglobin concentration; RDW: Red cell distribution width; PCT: Plateletcrit; MPV: Mean platelet volume; PDW: Platelet distribution width.

**Table S4. Serum chemistry values\* of C57BL/6J mice treated with vehicle or F5446.**

| Test**                  | Vehicle     | F5446       |            |
|-------------------------|-------------|-------------|------------|
|                         |             | 10 mg/kg    | 20 mg/kg   |
| ALT (U/L)               | 75 ± 57     | 65 ± 47     | 101 ± 47   |
| AST (U/L)               | 137 ± 56    | 122 ± 51    | 174 ± 90   |
| ALP (U/L)               | 76 ± 10     | 88 ± 13     | 77 ± 33    |
| GGT (U/L)               | 1 ± 1       | 2 ± 1       | 2 ± 1      |
| Total bilirubin (mg/dL) | 0.4 ± 0.1   | 0.3 ± 0.1   | 0.5 ± 0.4  |
| BUN (mg/dL)             | 16 ± 1      | 15 ± 2      | 13 ± 2     |
| Creatinine (mg/dL)      | 0.24 ± 0.08 | 0.28 ± 0.03 | 0.21 ± 0.7 |
| Calcium (mg/dL)         | 10.8 ± 0.3  | 10.7 ± 0.3  | 11.0 ± 0.1 |
| Phosphorous (mg/dL)     | 8.2 ± 0.5   | 8.4 ± 0.4   | 8.3 ± 0.8  |
| Albumin (g/dL)          | 3.3 ± 0.2   | 3.3 ± 0.1   | 3.2 ± 0.2  |
| Total protein (g/dL)    | 5.4 ± 0.3   | 5.4 ± 0.2   | 5.6 ± 0.5  |
| Globulin (g/dL)         | 2.1 ± 0.2   | 2.0 ± 0.2   | 2.4 ± 0.4  |
| Cholesterol (mg/dL)     | 82 ± 10     | 74 ± 9      | 85 ± 10    |
| Glucose (mg/dL)         | 253 ± 52    | 243 ± 65    | 220 ± 37   |
| Lipase (U/L)            | 196 ± 123   | 55 ± 6.2    | 98 ± 87    |
| Amylase (U/L)           | 1434 ± 723  | 648 ± 68    | 713 ± 338  |
| Creatine kinase (U/L)   | 314 ± 137   | 247 ± 144   | 306 ± 191  |
| Triglyceride (mg/dL)    | 111 ± 21    | 91 ± 10     | 124 ± 60   |

\*Values represent means ± SD (n=5).

\*Abbreviations: ALT: Alanine aminotransferase; AST: Aspartate aminotransferase; ALP: Alkaline phosphatase; GGT: gamma-glutamyl transferase; BUN: Blood urea nitrogen.
