# Supplementary material
Source: PubMed Central journal article supplement (PMC6397681)
Supplement: NIHMS1517449-supplement-2.pdf [file NIHMS1517449-supplement-2.pdf]

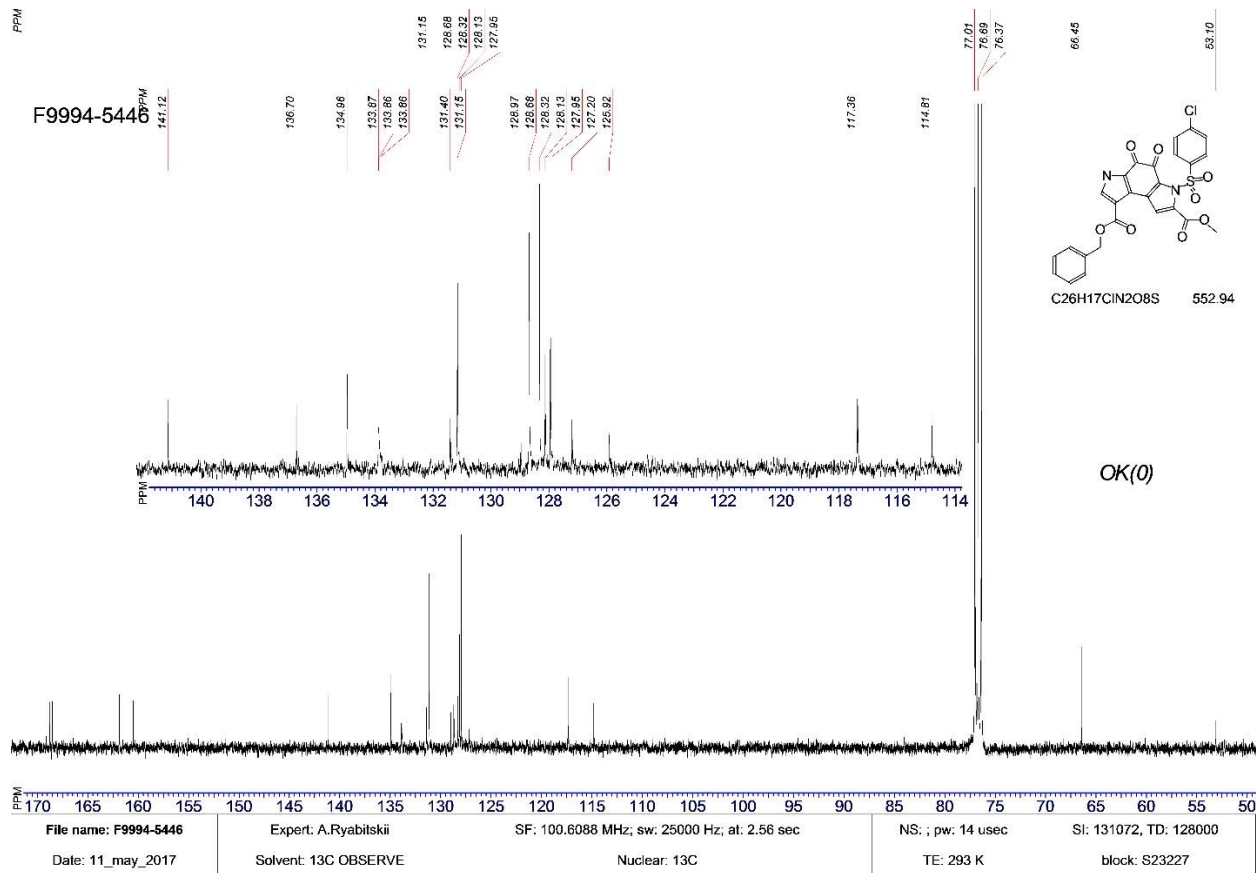

Figure S2. Characterization of synthesized F5446. F5446 <sup>13</sup>C spectrum.

-.o.-Syntez Purity Report -.o.-

Agilent 1100 LC/MSD SL  
 Diodearray G1315B (DAD1A-215nm; DAD1B-254nm)  
 Mass Quad G1956B (MSD1-Pos, MSD2-Neg)  
 ELSD Altech 3300 (ADC1 A, ELSD)

Mobile Phase:A-H2O+0.1%HCOOH;B-MeCN+0.1HCOOH  
 Separation col **97%**  
 Rapid Resolution HT Cartridge 4.6x30mm,  
 1.8-Micron, Zorbax SB C-18

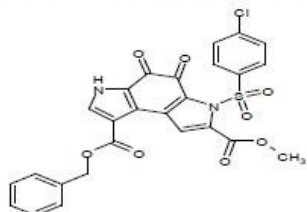

Mol.Weight: 552.95  
 Salt

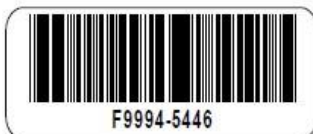

M24282 ->

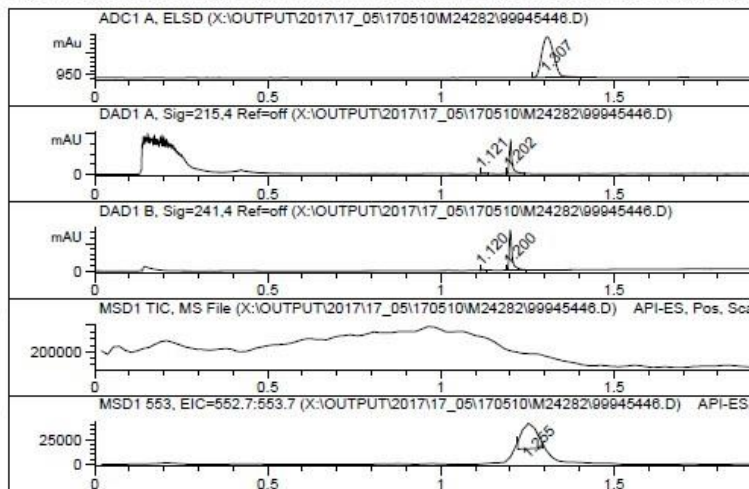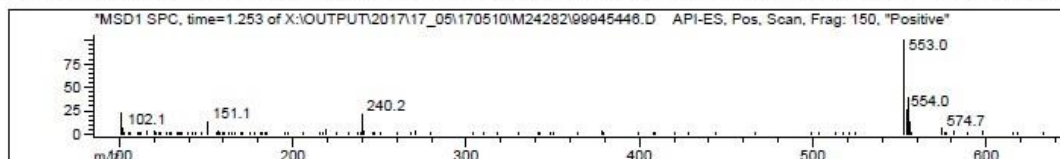

| #     | Signal                    | R.Time | Area %  |
|-------|---------------------------|--------|---------|
| 1     | ADC1 A, ELSD              | 1.307  | 100.000 |
| ----- |                           |        |         |
| #     | Signal                    | R.Time | Area %  |
| 1     | DAD1 A, Sig=215,4 Ref=off | 1.121  | 2.578   |
| 2     |                           | 1.202  | 97.422  |
| ----- |                           |        |         |
| #     | Signal                    | R.Time | Area %  |
| 1     | DAD1 B, Sig=241,4 Ref=off | 1.120  | 2.416   |
| 2     |                           | 1.200  | 97.584  |
| ----- |                           |        |         |
| #     | Signal                    | R.Time | Area %  |
| 1     | MSD1 553, EIC=552.7:553.7 | 1.255  | 100.000 |

Figure S3. Characterization of synthesized F5446. F5446 HPLC and mass spectrophotometry data

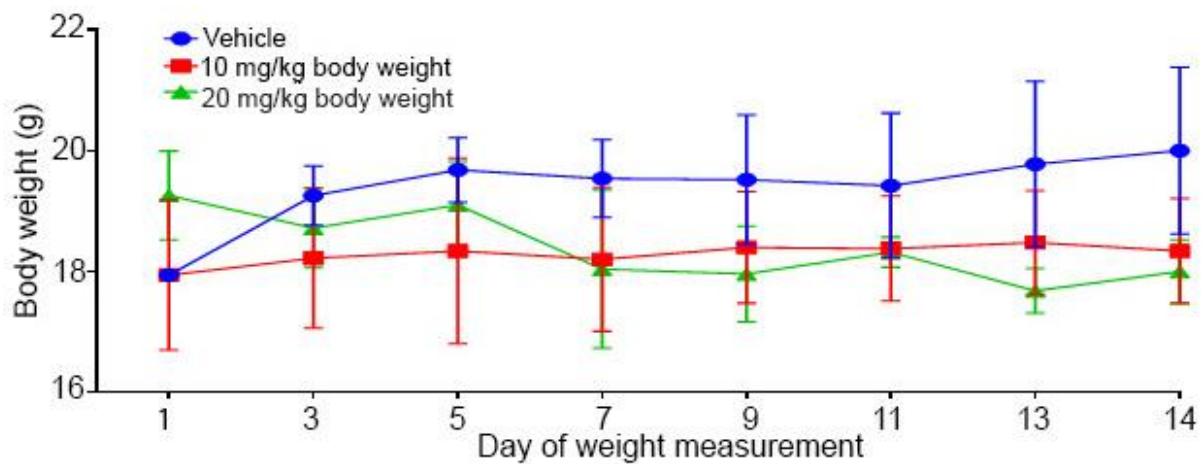

**Figure S4. Mouse weight change kinetics.** Mice were treated with vehicle (n=5), F5446 (n=5) at the indicated dose every 2 days for 7 times.

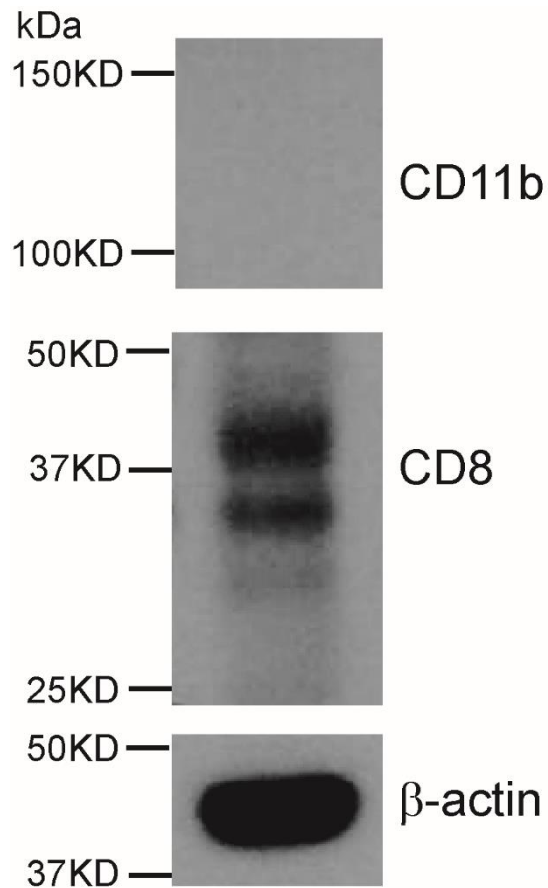

**Figure S5. Isolation of tumor-infiltrating CD8<sup>+</sup> CTLs.** Tumor tissues were collected from CT26 tumor-bearing mice and digested with collagenase to make single cells. The cell mixtures were incubated with anti-mouse CD8 mAb-coated magnet beads for 30 min in 4°C. The beads were pelleted in a magnet stand, washed once in PBS and lysed to make total cell lysate. The total cell lysate was analyzed by Western blotting with antibodies that are specific for the indicated proteins.  $\beta$ -actin was used as a normalization control.
